# Supplementary material for: Toll-Like Receptor 2 Modulates Pulmonary Inflammation and TNF-α Release Mediated by Mycoplasma pneumoniae
Source: Front Cell Infect Microbiol. 2022 Mar 17;12:824027. doi: 10.3389/fcimb.2022.824027 (PMC8968444; doi:10.3389/fcimb.2022.824027)
Supplement: Supplementary file 4 [file Table_3.xlsx]

## Sheet: Sheet1
Neutrophil
OD			OD				OD			TNF-α（pg/ml）			standard curve
N1	0.852		M1	1.575			NC	MP		NC	MP		TNF-α（pg/ml）	OD
N1	0.9		M1	1.6826			0.876	1.6288		183.114	398.2		0	0.1171
N2	0.734		M2	1.953			0.7514	1.9733		147.514	496.629		15.6	0.2137
N2	0.7688		M2	1.9936			0.9213	2.1587		196.057	549.6		31.2	0.3018
N3	0.893		M3	2.056			0.5278	2.4653		83.6286	637.2		62.5	0.4238
N3	0.9496		M3	2.2614			0.8277	2.9134		169.314	765.229		125	0.7266
N4	0.531		M4	2.387			0.5279	0.9724		83.6571	210.657		250	1.2241
N4	0.5246		M4	2.5436									500	2.1877
N5	0.857		M5	2.905									1000	3.545
N5	0.7984		M5	2.9218
N6	0.571		M6	0.987
N6	0.4848		M6	0.9578
A549
OD			OD				OD			TNF-α（pg/ml）			standard curve
N1	0.071		M1	0.096			NC	MP		NC	MP		TNF-α（pg/ml）	OD
N1	0.073		M1	0.104			0.072	0.096		8.26923	17.5		15.6	0.055
N2	0.072		M2	0.112			0.074	0.104		9.03846	20.5769		31.2	0.107
N2	0.076		M2	0.096			0.077	0.1		10.1923	19.0385		62.5	0.224
N3	0.074		M3	0.11			0.074	0.105		9.03846	20.9615		125	0.39
N3	0.08		M3	0.09			0.086	0.102		13.6538	19.8077		250	0.74
N4	0.069		M4	0.102									500	1.409
N4	0.079		M4	0.108									1000	2.656
N5	0.079		M5	0.098
N5	0.093		M5	0.106
